# Supplementary material for: Neutrophil Pathways of Inflammation Characterize the Blood Transcriptomic Signature of Patients with Psoriasis and Cardiovascular Disease
Source: MDPI journal article supplement (doi:10.3390/ijms221910818), 2021-10-06

## Supplementary material

**Figure S1:** GO functional enrichment for biological processes of downregulated DEGs. All significant biological processes are reported. Intersection size indicates how many of the down-regulated genes included in the analysis that are annotated to the specific GO biological process. Significance level,  $p$ -adjust  $< 0.05$ .

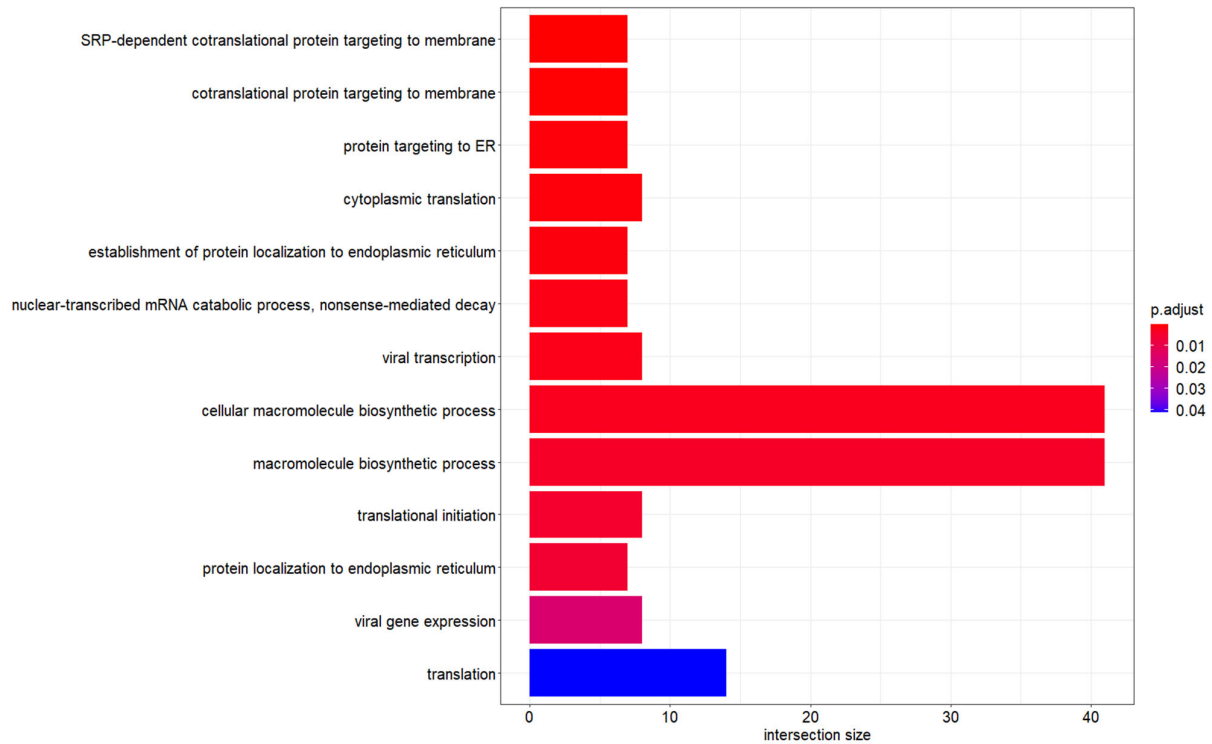

**Figure S2:** Reactome pathway database functional enrichment of up – and downregulated DEGs. Intersection size indicates how many of the downregulated genes included in the analysis that are annotated to the specific pathway. Significance level,  $p\text{-adjust} < 0.05$ .

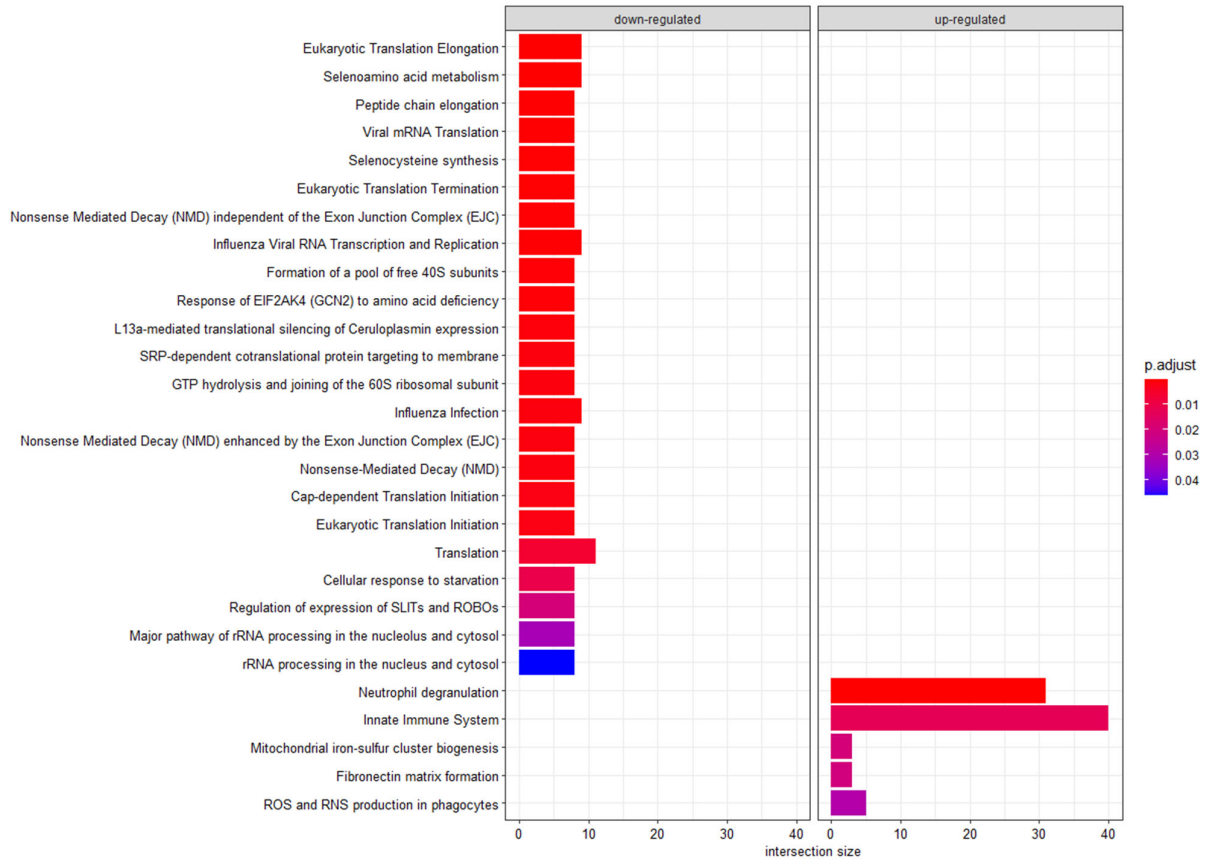

**Figure S3:** Kyoto Encyclopedia of Genes and Genomes functional enrichment of up- and downregulated DEGs. There were no significant results for the up-regulated DEGs. Intersection size indicates how many of the down-regulated genes included in the analysis that are annotated to the specific pathway. Significance level,  $p\text{-adjust} < 0.05$ .

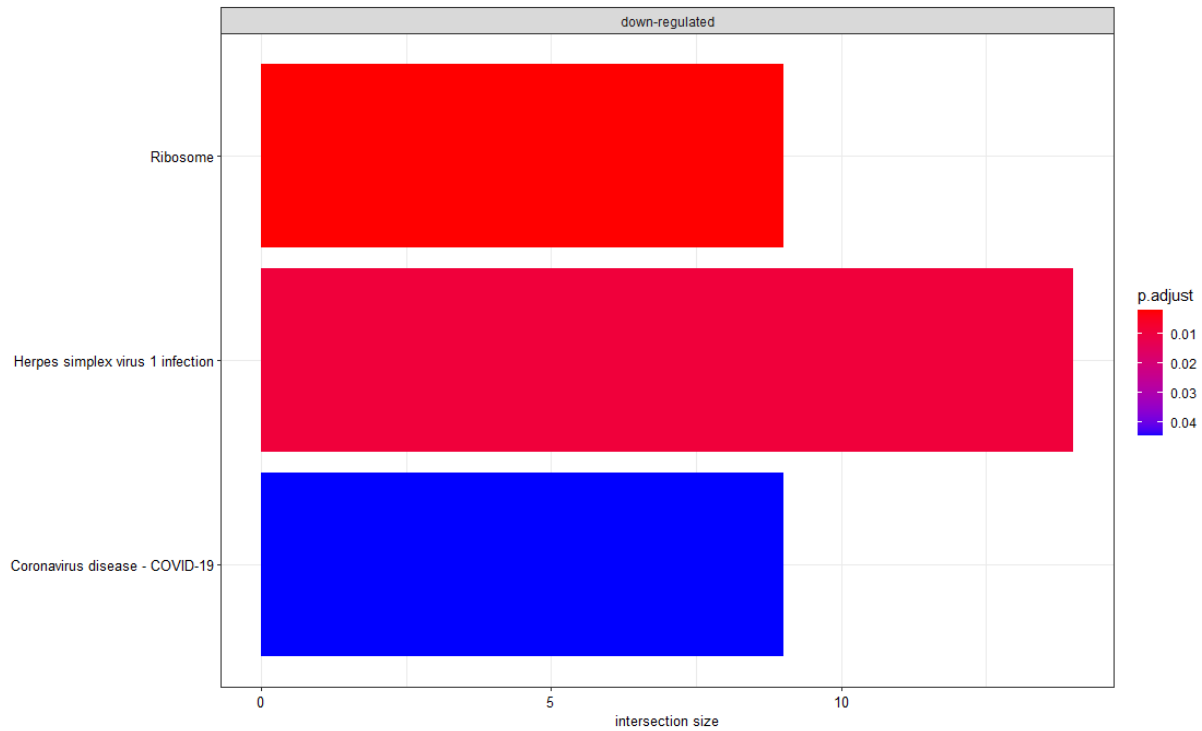

Supplement: s1 [file s1]
